# Supplementary material for: Structure of an Enzyme-Derived Phosphoprotein Recognition Domain
Source: PubMed Central journal article supplement (PMC3335814; doi:10.1371/journal.pone.0036014), 2012-04-24

Figure S1

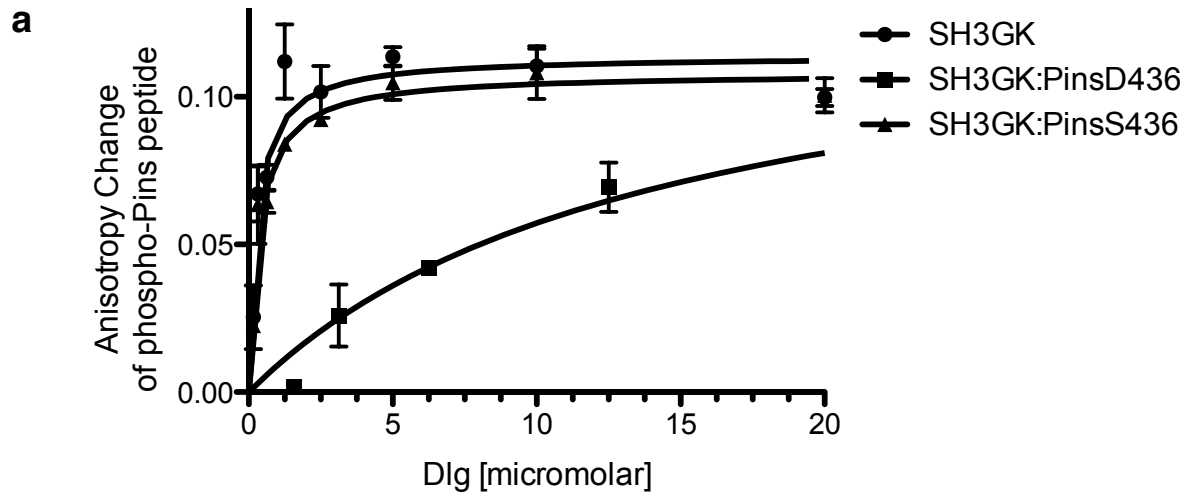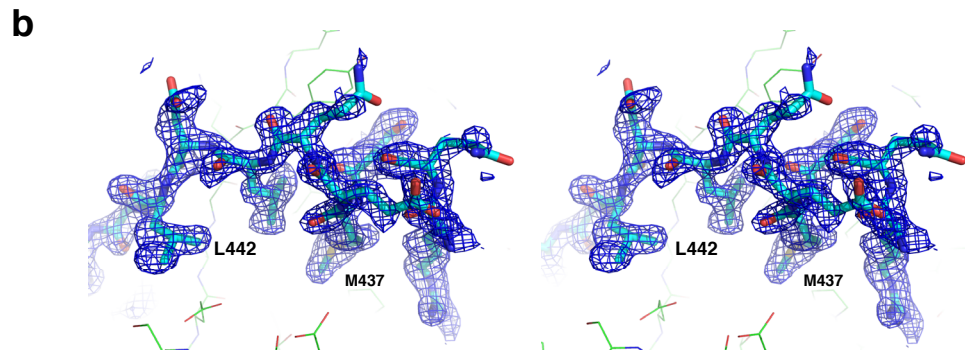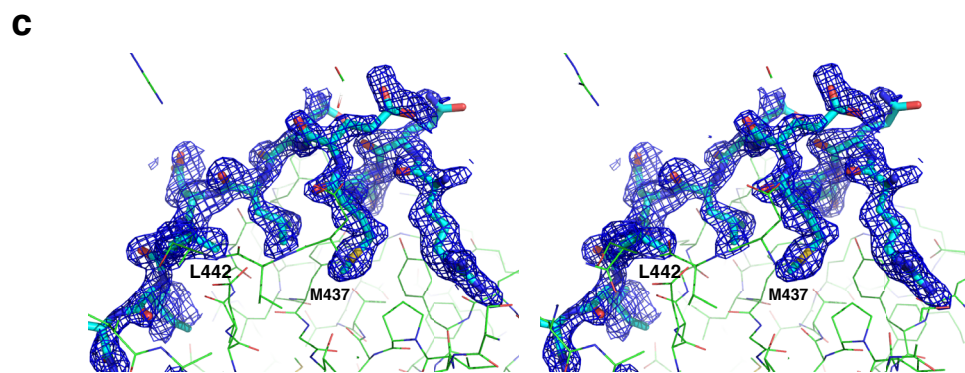

Supplement: pone.0036014.s001.pdf [file pone.0036014.s001.pdf]
